# Supplementary material for: HGIMDA: Heterogeneous graph inference for miRNA-disease association prediction
Source: PubMed Central journal article supplement (PMC5323153; doi:10.18632/oncotarget.11251), 2016-08-12
Supplement: oncotarget-07-65257-s001.pdf [file oncotarget-07-65257-s001.pdf]

## **HGIMDA: Heterogeneous graph inference for miRNA-disease association prediction**

### **SUPPLEMENTARY TABLE**

**Supplementary Table S1: HGIMDA was implemented to prioritize candidate miRNAs for all the diseases investigated in HMDD**

See Supplementary File 1
